# Supplementary material for: Construction and validation of an eight-gene signature with great prognostic value in bladder cancer
Source: PubMed Central journal article supplement (PMC7052873; doi:10.7150/jca.38741), 2020-01-17
Supplement: jcav11p1768s1.pdf [file jcav11p1768s1.pdf]

Supplementary materials:

Supplementary figures:

Figure S1: The clustering was based on the expression data of GSE31684. The top 5,000 genes with the highest SD values were used for the analysis by WGCNA. The color intensity was proportional to gender, survival months (survival time), stage, grade and age.

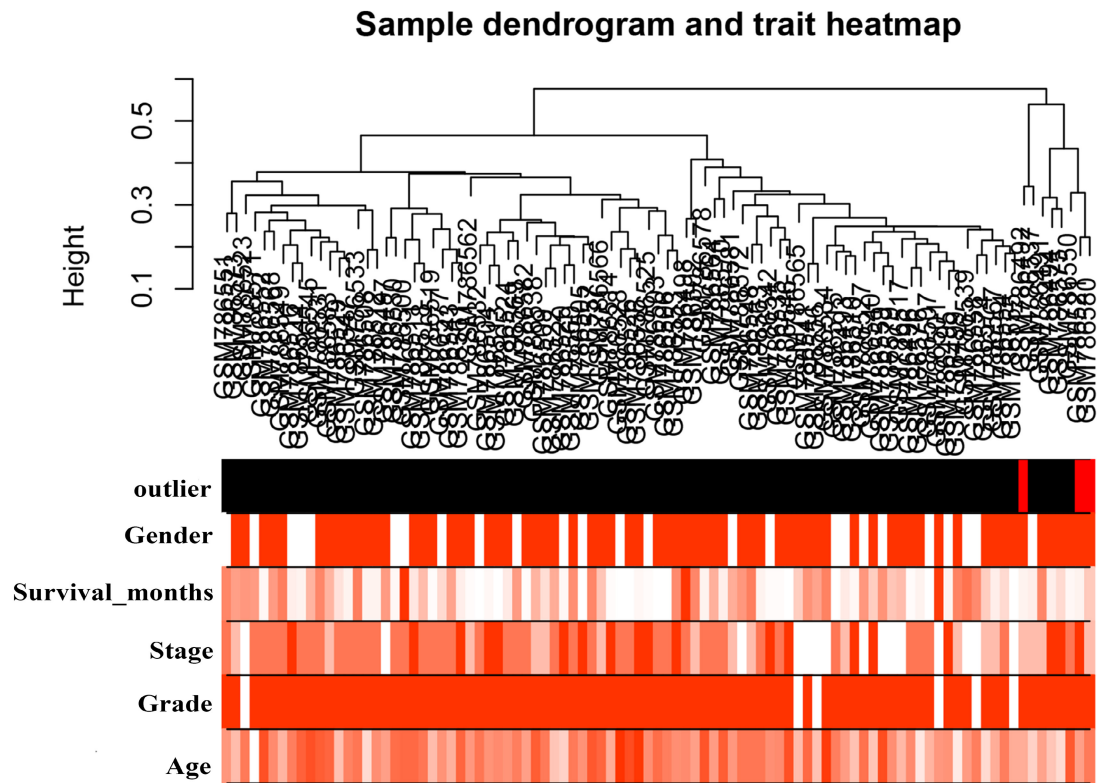

Figure S2: Determination of soft-thresholding power in the weighted gene co-expression network analysis (WGCNA). (A) Analysis of the scale-free fit index for various soft-thresholding powers ( $\beta$ ). (B) Analysis of the mean connectivity for various soft-thresholding powers. (C) Histogram of connectivity distribution when  $\beta = 4$ . (D) Checking the scale free topology when  $\beta = 4$ .

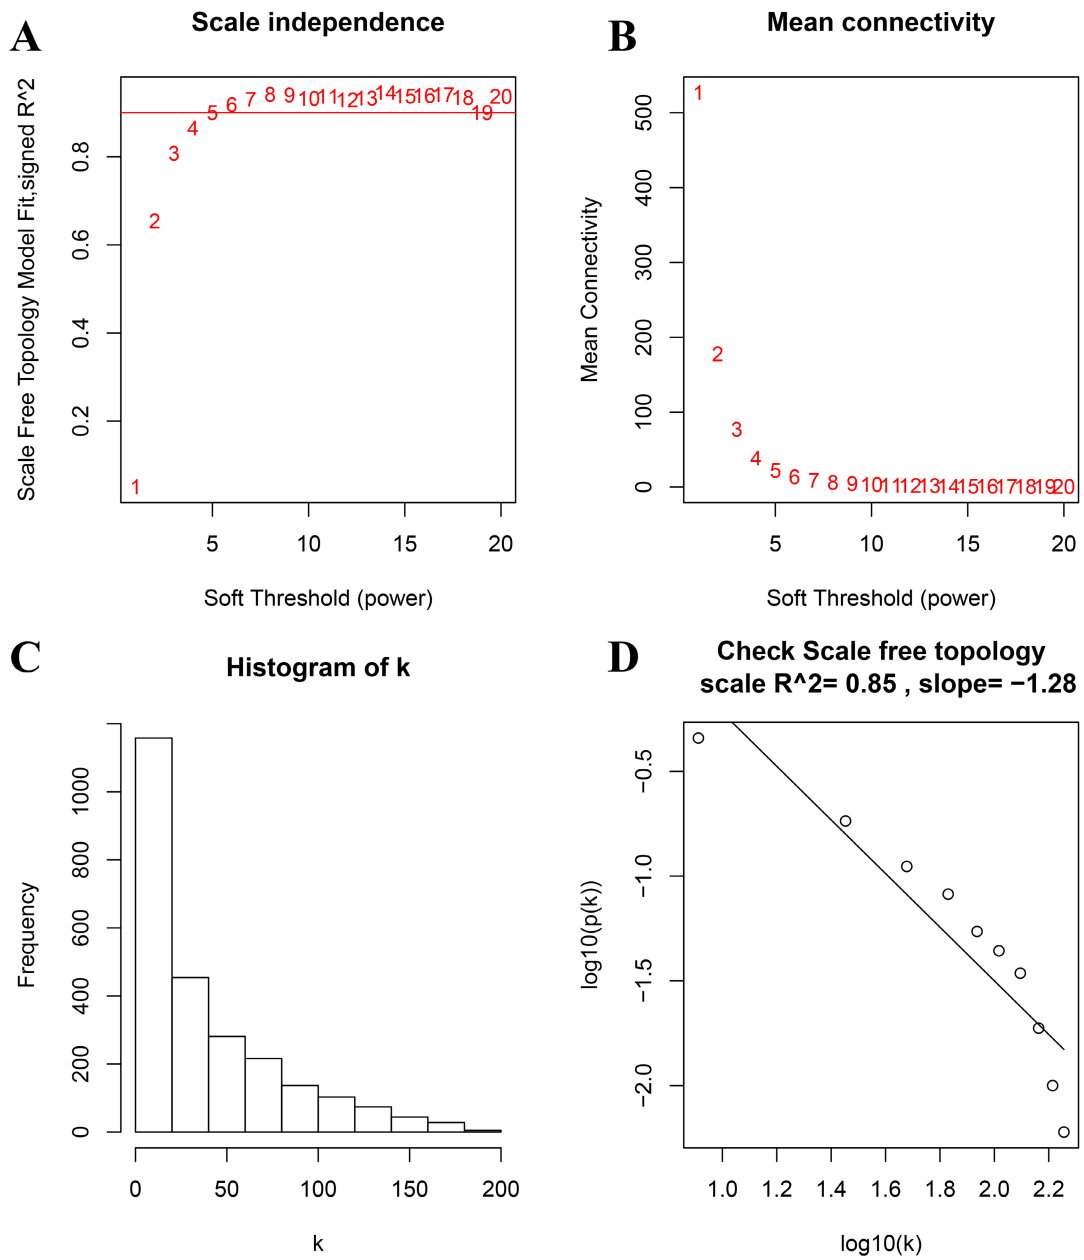

Figure S3: The cluster dendrogram of genes in GSE31684. Each branch in the figure represents one gene, and every color below represents one co-expression module.

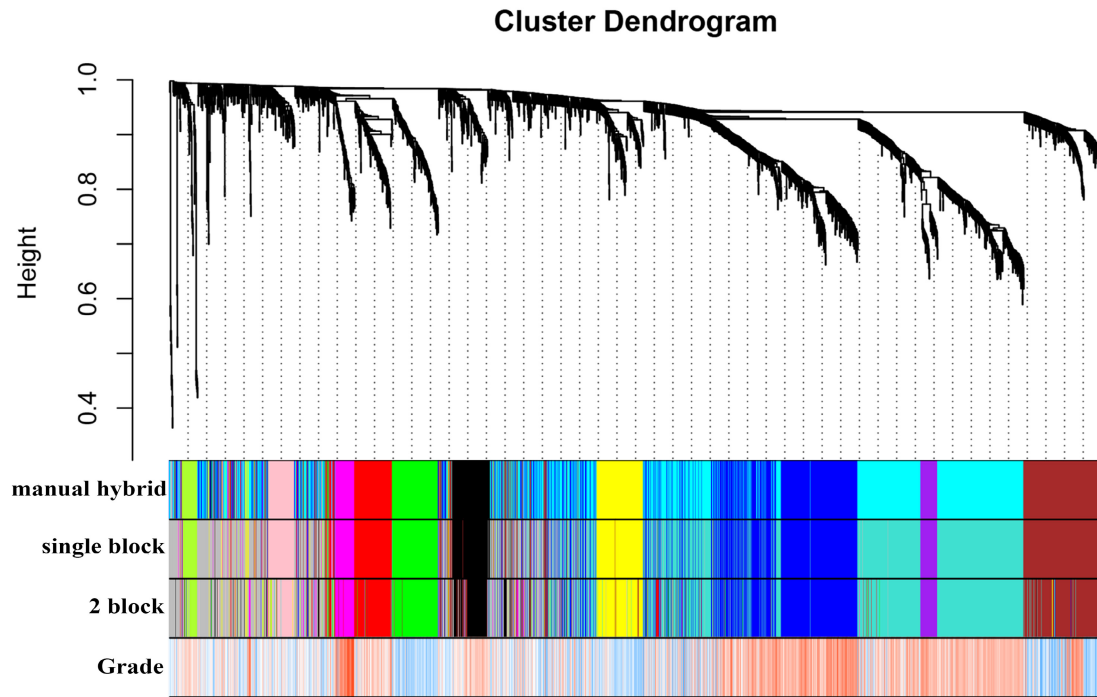

Figure S4: (A) Interaction relationship analysis of co-expression genes. Different colors of horizontal axis and vertical axis represent different modules. The brightness of yellow in the middle represents the degree of connectivity of different modules. There was no significant difference in interactions among different modules, indicating a high-scale independence degree among these modules. (B) Classical MDS plot whose input is the TOM dissimilarity. Each dot (gene) is colored by the module assignment.

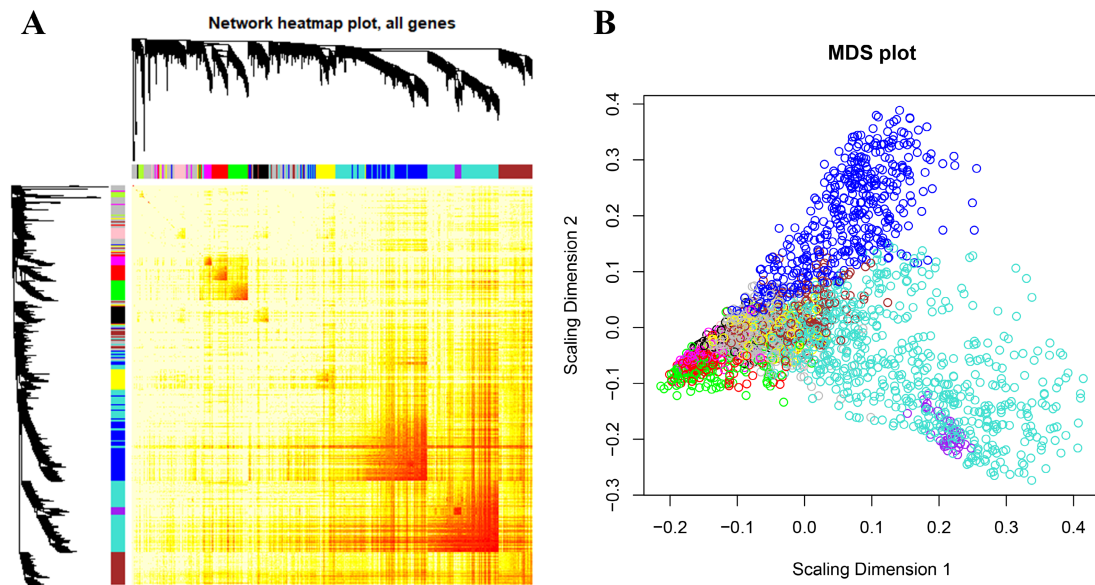

## Supplementary tables:

Table S1: Gene Ontology (GO) biological processes of genes in key module.

| ID         | Description                                                   | GeneRatio | BgRatio   | pvalue   | p.adjust | qvalue   | Count |
|------------|---------------------------------------------------------------|-----------|-----------|----------|----------|----------|-------|
| GO:0048285 | organelle fission                                             | 18/65     | 457/17653 | 3.18E-14 | 1.34E-11 | 9.90E-12 | 18    |
| GO:0007059 | chromosome segregation                                        | 17/65     | 358/17653 | 8.77E-15 | 8.92E-12 | 6.61E-12 | 17    |
| GO:0000280 | nuclear division                                              | 16/65     | 411/17653 | 1.27E-12 | 1.85E-10 | 1.37E-10 | 16    |
| GO:0140014 | mitotic nuclear division                                      | 15/65     | 269/17653 | 3.94E-14 | 1.34E-11 | 9.90E-12 | 15    |
| GO:0000819 | sister chromatid segregation                                  | 14/65     | 239/17653 | 1.57E-13 | 3.19E-11 | 2.37E-11 | 14    |
| GO:0098813 | nuclear chromosome segregation                                | 14/65     | 307/17653 | 4.74E-12 | 5.35E-10 | 3.97E-10 | 14    |
| GO:1902850 | microtubule cytoskeleton<br>organization involved in mitosis  | 12/65     | 132/17653 | 5.28E-14 | 1.34E-11 | 9.96E-12 | 12    |
| GO:0007051 | spindle organization                                          | 12/65     | 183/17653 | 2.68E-12 | 3.40E-10 | 2.52E-10 | 12    |
| GO:0007052 | mitotic spindle organization                                  | 11/65     | 113/17653 | 3.01E-13 | 5.11E-11 | 3.79E-11 | 11    |
| GO:1901987 | regulation of cell cycle phase<br>transition                  | 11/65     | 454/17653 | 7.39E-07 | 4.77E-05 | 3.54E-05 | 11    |
| GO:0000070 | mitotic sister chromatid segregation                          | 10/65     | 152/17653 | 1.98E-10 | 2.02E-08 | 1.50E-08 | 10    |
| GO:0051783 | regulation of nuclear division                                | 10/65     | 184/17653 | 1.29E-09 | 1.19E-07 | 8.85E-08 | 10    |
| GO:0045787 | positive regulation of cell cycle                             | 10/65     | 377/17653 | 1.10E-06 | 5.61E-05 | 4.15E-05 | 10    |
| GO:1901990 | regulation of mitotic cell cycle<br>phase transition          | 10/65     | 419/17653 | 2.85E-06 | 0.000107 | 7.94E-05 | 10    |
| GO:0007088 | regulation of mitotic nuclear<br>division                     | 9/65      | 161/17653 | 7.21E-09 | 6.11E-07 | 4.53E-07 | 9     |
| GO:0090068 | positive regulation of cell cycle<br>process                  | 9/65      | 277/17653 | 7.51E-07 | 4.77E-05 | 3.54E-05 | 9     |
| GO:0007062 | sister chromatid cohesion                                     | 8/65      | 134/17653 | 3.13E-08 | 2.45E-06 | 1.82E-06 | 8     |
| GO:0007050 | cell cycle arrest                                             | 8/65      | 250/17653 | 3.64E-06 | 0.000124 | 9.19E-05 | 8     |
| GO:0044843 | cell cycle G1/S phase transition                              | 8/65      | 295/17653 | 1.22E-05 | 0.000303 | 0.000225 | 8     |
| GO:0051225 | spindle assembly                                              | 7/65      | 122/17653 | 3.16E-07 | 2.30E-05 | 1.70E-05 | 7     |
| GO:0000910 | cytokinesis                                                   | 7/65      | 172/17653 | 3.19E-06 | 0.000116 | 8.59E-05 | 7     |
| GO:0000086 | G2/M transition of mitotic cell<br>cycle                      | 7/65      | 250/17653 | 3.63E-05 | 0.00077  | 0.00057  | 7     |
| GO:0044839 | cell cycle G2/M phase transition                              | 7/65      | 267/17653 | 5.51E-05 | 0.001099 | 0.000815 | 7     |
| GO:0000082 | G1/S transition of mitotic cell cycle                         | 7/65      | 276/17653 | 6.79E-05 | 0.001303 | 0.000966 | 7     |
| GO:0033044 | regulation of chromosome<br>organization                      | 7/65      | 311/17653 | 0.000143 | 0.002202 | 0.001632 | 7     |
| GO:0051656 | establishment of organelle<br>localization                    | 7/65      | 450/17653 | 0.001299 | 0.010401 | 0.007708 | 7     |
| GO:0051983 | regulation of chromosome<br>segregation                       | 6/65      | 100/17653 | 1.79E-06 | 7.59E-05 | 5.62E-05 | 6     |
| GO:0071156 | regulation of cell cycle arrest                               | 6/65      | 113/17653 | 3.66E-06 | 0.000124 | 9.19E-05 | 6     |
| GO:0007093 | mitotic cell cycle checkpoint                                 | 6/65      | 166/17653 | 3.30E-05 | 0.000714 | 0.000529 | 6     |
| GO:0000075 | cell cycle checkpoint                                         | 6/65      | 225/17653 | 0.000177 | 0.002686 | 0.00199  | 6     |
| GO:1901991 | negative regulation of mitotic cell<br>cycle phase transition | 6/65      | 236/17653 | 0.000229 | 0.003025 | 0.002242 | 6     |

|            |                                                                         |      |           |          |          |          |   |
|------------|-------------------------------------------------------------------------|------|-----------|----------|----------|----------|---|
| GO:0051321 | meiotic cell cycle                                                      | 6/65 | 246/17653 | 0.000286 | 0.003513 | 0.002603 | 6 |
| GO:1901988 | negative regulation of cell cycle phase transition                      | 6/65 | 256/17653 | 0.000354 | 0.004188 | 0.003104 | 6 |
| GO:0072331 | signal transduction by p53 class mediator                               | 6/65 | 272/17653 | 0.000488 | 0.0054   | 0.004002 | 6 |
| GO:0045930 | negative regulation of mitotic cell cycle                               | 6/65 | 319/17653 | 0.001121 | 0.009497 | 0.007038 | 6 |
| GO:0010948 | negative regulation of cell cycle process                               | 6/65 | 350/17653 | 0.001797 | 0.013339 | 0.009885 | 6 |
| GO:0030071 | regulation of mitotic metaphase/anaphase transition                     | 5/65 | 48/17653  | 8.77E-07 | 5.21E-05 | 3.86E-05 | 5 |
| GO:1902099 | regulation of metaphase/anaphase transition of cell cycle               | 5/65 | 49/17653  | 9.74E-07 | 5.21E-05 | 3.86E-05 | 5 |
| GO:0007091 | metaphase/anaphase transition of mitotic cell cycle                     | 5/65 | 51/17653  | 1.19E-06 | 5.78E-05 | 4.28E-05 | 5 |
| GO:0044784 | metaphase/anaphase transition of cell cycle                             | 5/65 | 52/17653  | 1.32E-06 | 6.08E-05 | 4.51E-05 | 5 |
| GO:0010965 | regulation of mitotic sister chromatid separation                       | 5/65 | 54/17653  | 1.59E-06 | 7.04E-05 | 5.22E-05 | 5 |
| GO:0051306 | mitotic sister chromatid separation                                     | 5/65 | 56/17653  | 1.91E-06 | 7.78E-05 | 5.77E-05 | 5 |
| GO:1905818 | regulation of chromosome separation                                     | 5/65 | 58/17653  | 2.28E-06 | 8.92E-05 | 6.61E-05 | 5 |
| GO:0033047 | regulation of mitotic sister chromatid segregation                      | 5/65 | 65/17653  | 4.03E-06 | 0.000132 | 9.80E-05 | 5 |
| GO:0000281 | mitotic cytokinesis                                                     | 5/65 | 67/17653  | 4.69E-06 | 0.000144 | 0.000107 | 5 |
| GO:0090307 | mitotic spindle assembly                                                | 5/65 | 67/17653  | 4.69E-06 | 0.000144 | 0.000107 | 5 |
| GO:0033045 | regulation of sister chromatid segregation                              | 5/65 | 76/17653  | 8.74E-06 | 0.000261 | 0.000194 | 5 |
| GO:0051303 | establishment of chromosome localization                                | 5/65 | 77/17653  | 9.32E-06 | 0.000271 | 0.000201 | 5 |
| GO:0050000 | chromosome localization anaphase-promoting                              | 5/65 | 78/17653  | 9.93E-06 | 0.000277 | 0.000206 | 5 |
| GO:0031145 | complex-dependent catabolic process                                     | 5/65 | 80/17653  | 1.12E-05 | 0.000293 | 0.000217 | 5 |
| GO:0051304 | chromosome separation                                                   | 5/65 | 80/17653  | 1.12E-05 | 0.000293 | 0.000217 | 5 |
| GO:0061640 | cytoskeleton-dependent cytokinesis                                      | 5/65 | 81/17653  | 1.20E-05 | 0.000303 | 0.000225 | 5 |
| GO:0000079 | regulation of cyclin-dependent protein serine/threonine kinase activity | 5/65 | 88/17653  | 1.79E-05 | 0.000424 | 0.000314 | 5 |
| GO:0071158 | positive regulation of cell cycle arrest                                | 5/65 | 88/17653  | 1.79E-05 | 0.000424 | 0.000314 | 5 |
| GO:1904029 | regulation of cyclin-dependent protein kinase activity                  | 5/65 | 93/17653  | 2.34E-05 | 0.00053  | 0.000392 | 5 |
| GO:0030330 | DNA damage response, signal                                             | 5/65 | 110/17653 | 5.26E-05 | 0.00107  | 0.000793 | 5 |

|            |                                                                                               |      |           |          |          |          |   |
|------------|-----------------------------------------------------------------------------------------------|------|-----------|----------|----------|----------|---|
|            | transduction by p53 class mediator                                                            |      |           |          |          |          |   |
| GO:0042770 | signal transduction in response to DNA damage                                                 | 5/65 | 134/17653 | 0.000134 | 0.002148 | 0.001592 | 5 |
| GO:0045931 | positive regulation of mitotic cell cycle                                                     | 5/65 | 148/17653 | 0.000213 | 0.00291  | 0.002157 | 5 |
| GO:0140013 | meiotic nuclear division                                                                      | 5/65 | 174/17653 | 0.00045  | 0.005141 | 0.00381  | 5 |
| GO:1903046 | meiotic cell cycle process                                                                    | 5/65 | 189/17653 | 0.000655 | 0.006532 | 0.004841 | 5 |
| GO:0006323 | DNA packaging                                                                                 | 5/65 | 208/17653 | 0.001007 | 0.008893 | 0.006591 | 5 |
| GO:1902749 | regulation of cell cycle G2/M phase transition                                                | 5/65 | 216/17653 | 0.001192 | 0.009853 | 0.007302 | 5 |
| GO:0051383 | kinetochore organization                                                                      | 4/65 | 21/17653  | 9.56E-07 | 5.21E-05 | 3.86E-05 | 4 |
| GO:0016572 | histone phosphorylation                                                                       | 4/65 | 37/17653  | 1.01E-05 | 0.000277 | 0.000206 | 4 |
| GO:0007080 | mitotic metaphase plate congression                                                           | 4/65 | 44/17653  | 2.03E-05 | 0.00047  | 0.000348 | 4 |
| GO:0034508 | centromere complex assembly                                                                   | 4/65 | 53/17653  | 4.28E-05 | 0.000888 | 0.000658 | 4 |
| GO:0051310 | metaphase plate congression                                                                   | 4/65 | 57/17653  | 5.71E-05 | 0.001117 | 0.000828 | 4 |
|            | DNA damage response, signal transduction by p53 class mediator resulting in cell cycle arrest |      |           |          |          |          |   |
| GO:0006977 | signal transduction involved in                                                               | 4/65 | 62/17653  | 7.95E-05 | 0.001498 | 0.00111  | 4 |
|            | mitotic G1 DNA damage checkpoint                                                              |      |           |          |          |          |   |
| GO:0072431 | intracellular signal transduction                                                             | 4/65 | 63/17653  | 8.47E-05 | 0.001538 | 0.00114  | 4 |
|            | involved in G1 DNA damage checkpoint                                                          |      |           |          |          |          |   |
| GO:1902400 | signal transduction involved in                                                               | 4/65 | 63/17653  | 8.47E-05 | 0.001538 | 0.00114  | 4 |
|            | mitotic cell cycle checkpoint                                                                 |      |           |          |          |          |   |
| GO:0072413 | signal transduction involved in                                                               | 4/65 | 65/17653  | 9.57E-05 | 0.001623 | 0.001203 | 4 |
|            | mitotic DNA damage checkpoint                                                                 |      |           |          |          |          |   |
| GO:1902402 | signal transduction involved in                                                               | 4/65 | 65/17653  | 9.57E-05 | 0.001623 | 0.001203 | 4 |
|            | mitotic DNA integrity checkpoint                                                              |      |           |          |          |          |   |
| GO:1902403 | mitotic G1 DNA damage checkpoint                                                              | 4/65 | 71/17653  | 0.000135 | 0.002148 | 0.001592 | 4 |
| GO:0031571 | mitotic G1/S transition checkpoint                                                            | 4/65 | 71/17653  | 0.000135 | 0.002148 | 0.001592 | 4 |
| GO:0044819 | G1 DNA damage checkpoint                                                                      | 4/65 | 72/17653  | 0.000143 | 0.002202 | 0.001632 | 4 |
| GO:0044783 | signal transduction involved in                                                               | 4/65 | 78/17653  | 0.000195 | 0.00281  | 0.002083 | 4 |
| GO:0072401 | DNA integrity checkpoint                                                                      | 4/65 | 78/17653  | 0.000195 | 0.00281  | 0.002083 | 4 |
| GO:0072422 | signal transduction involved in                                                               | 4/65 | 78/17653  | 0.000195 | 0.00281  | 0.002083 | 4 |
|            | DNA damage checkpoint                                                                         |      |           |          |          |          |   |
| GO:0072395 | signal transduction involved in cell cycle checkpoint                                         | 4/65 | 79/17653  | 0.000204 | 0.002848 | 0.002111 | 4 |
| GO:0048477 | oogenesis                                                                                     | 4/65 | 80/17653  | 0.000215 | 0.00291  | 0.002157 | 4 |
| GO:0006890 | retrograde vesicle-mediated transport, Golgi to ER                                            | 4/65 | 83/17653  | 0.000247 | 0.003144 | 0.00233  | 4 |
| GO:1901989 | positive regulation of cell cycle                                                             | 4/65 | 87/17653  | 0.000296 | 0.003587 | 0.002658 | 4 |

|            |                                                                                           |      |           |          |          |          |   |
|------------|-------------------------------------------------------------------------------------------|------|-----------|----------|----------|----------|---|
|            | phase transition                                                                          |      |           |          |          |          |   |
|            | antigen processing and presentation                                                       |      |           |          |          |          |   |
| GO:0019886 | of exogenous peptide antigen via MHC class II                                             | 4/65 | 98/17653  | 0.000466 | 0.005213 | 0.003863 | 4 |
| GO:0002495 | antigen processing and presentation of peptide antigen via MHC class II                   | 4/65 | 101/17653 | 0.000523 | 0.005607 | 0.004155 | 4 |
| GO:0002504 | antigen processing and presentation of peptide or polysaccharide antigen via MHC class II | 4/65 | 102/17653 | 0.000543 | 0.005691 | 0.004217 | 4 |
| GO:0044773 | mitotic DNA damage checkpoint                                                             | 4/65 | 107/17653 | 0.00065  | 0.006532 | 0.004841 | 4 |
| GO:0044774 | mitotic DNA integrity checkpoint                                                          | 4/65 | 113/17653 | 0.000798 | 0.007728 | 0.005727 | 4 |
| GO:2000134 | negative regulation of G1/S transition of mitotic cell cycle                              | 4/65 | 116/17653 | 0.00088  | 0.008063 | 0.005975 | 4 |
| GO:1902807 | negative regulation of cell cycle G1/S phase transition                                   | 4/65 | 123/17653 | 0.001095 | 0.009354 | 0.006932 | 4 |
| GO:2001251 | negative regulation of chromosome organization                                            | 4/65 | 123/17653 | 0.001095 | 0.009354 | 0.006932 | 4 |
| GO:0007292 | female gamete generation                                                                  | 4/65 | 127/17653 | 0.001232 | 0.010026 | 0.00743  | 4 |
| GO:2000241 | regulation of reproductive process                                                        | 4/65 | 140/17653 | 0.001764 | 0.013191 | 0.009776 | 4 |
| GO:0051382 | kinetochore assembly                                                                      | 3/65 | 16/17653  | 2.58E-05 | 0.00057  | 0.000422 | 3 |
| GO:0001556 | oocyte maturation                                                                         | 3/65 | 24/17653  | 9.13E-05 | 0.001623 | 0.001203 | 3 |
| GO:1902751 | positive regulation of cell cycle G2/M phase transition                                   | 3/65 | 26/17653  | 0.000117 | 0.001944 | 0.001441 | 3 |
| GO:0007094 | mitotic spindle assembly checkpoint                                                       | 3/65 | 31/17653  | 0.000199 | 0.00281  | 0.002083 | 3 |
| GO:0071173 | spindle assembly checkpoint                                                               | 3/65 | 31/17653  | 0.000199 | 0.00281  | 0.002083 | 3 |
| GO:0071174 | mitotic spindle checkpoint                                                                | 3/65 | 31/17653  | 0.000199 | 0.00281  | 0.002083 | 3 |
| GO:0045841 | negative regulation of mitotic metaphase/anaphase transition                              | 3/65 | 32/17653  | 0.000219 | 0.00293  | 0.002171 | 3 |
| GO:0008608 | attachment of spindle microtubules to kinetochore                                         | 3/65 | 33/17653  | 0.00024  | 0.003093 | 0.002292 | 3 |
| GO:1902100 | negative regulation of metaphase/anaphase transition of cell cycle                        | 3/65 | 33/17653  | 0.00024  | 0.003093 | 0.002292 | 3 |
| GO:0031577 | spindle checkpoint                                                                        | 3/65 | 34/17653  | 0.000263 | 0.003299 | 0.002445 | 3 |
| GO:2000816 | negative regulation of mitotic sister chromatid separation                                | 3/65 | 35/17653  | 0.000287 | 0.003513 | 0.002603 | 3 |
| GO:1905819 | negative regulation of chromosome separation                                              | 3/65 | 36/17653  | 0.000312 | 0.003732 | 0.002766 | 3 |
| GO:0033048 | negative regulation of mitotic sister chromatid segregation                               | 3/65 | 38/17653  | 0.000367 | 0.004285 | 0.003176 | 3 |
| GO:0033046 | negative regulation of sister chromatid segregation                                       | 3/65 | 40/17653  | 0.000427 | 0.004936 | 0.003658 | 3 |
| GO:0051985 | negative regulation of chromosome                                                         | 3/65 | 41/17653  | 0.00046  | 0.005193 | 0.003849 | 3 |



|            | segregation                                                  |      |          |          |          |          |   |
|------------|--------------------------------------------------------------|------|----------|----------|----------|----------|---|
| GO:0034080 | CENP-A containing nucleosome assembly                        | 3/65 | 43/17653 | 0.000529 | 0.005607 | 0.004155 | 3 |
| GO:0051445 | regulation of meiotic cell cycle                             | 3/65 | 43/17653 | 0.000529 | 0.005607 | 0.004155 | 3 |
| GO:0061641 | CENP-A containing chromatin organization                     | 3/65 | 43/17653 | 0.000529 | 0.005607 | 0.004155 | 3 |
| GO:0048599 | oocyte development                                           | 3/65 | 44/17653 | 0.000567 | 0.005879 | 0.004357 | 3 |
| GO:0031055 | chromatin remodeling at centromere                           | 3/65 | 45/17653 | 0.000605 | 0.006157 | 0.004563 | 3 |
| GO:0045839 | negative regulation of mitotic nuclear division              | 3/65 | 48/17653 | 0.000732 | 0.007229 | 0.005357 | 3 |
| GO:0009994 | oocyte differentiation                                       | 3/65 | 49/17653 | 0.000778 | 0.007606 | 0.005637 | 3 |
| GO:0006336 | DNA replication-independent nucleosome assembly              | 3/65 | 53/17653 | 0.000979 | 0.008887 | 0.006586 | 3 |
| GO:0034724 | DNA replication-independent nucleosome organization          | 3/65 | 54/17653 | 0.001034 | 0.008984 | 0.006658 | 3 |
| GO:0043486 | histone exchange                                             | 3/65 | 57/17653 | 0.00121  | 0.009922 | 0.007353 | 3 |
| GO:0051784 | negative regulation of nuclear division                      | 3/65 | 58/17653 | 0.001272 | 0.01027  | 0.007611 | 3 |
| GO:1901607 | alpha-amino acid biosynthetic process                        | 3/65 | 63/17653 | 0.001616 | 0.012547 | 0.009298 | 3 |
| GO:0051256 | mitotic spindle midzone assembly                             | 2/65 | 10/17653 | 0.000589 | 0.006055 | 0.004487 | 2 |
| GO:0000022 | mitotic spindle elongation                                   | 2/65 | 12/17653 | 0.00086  | 0.007955 | 0.005895 | 2 |
| GO:0006563 | L-serine metabolic process                                   | 2/65 | 12/17653 | 0.00086  | 0.007955 | 0.005895 | 2 |
| GO:0035404 | histone-serine phosphorylation                               | 2/65 | 12/17653 | 0.00086  | 0.007955 | 0.005895 | 2 |
| GO:0051255 | spindle midzone assembly                                     | 2/65 | 12/17653 | 0.00086  | 0.007955 | 0.005895 | 2 |
| GO:0055015 | ventricular cardiac muscle cell development                  | 2/65 | 12/17653 | 0.00086  | 0.007955 | 0.005895 | 2 |
| GO:0000212 | meiotic spindle organization                                 | 2/65 | 13/17653 | 0.001014 | 0.008893 | 0.006591 | 2 |
| GO:0051231 | spindle elongation                                           | 2/65 | 13/17653 | 0.001014 | 0.008893 | 0.006591 | 2 |
| GO:0051315 | attachment of mitotic spindle microtubules to kinetochore    | 2/65 | 13/17653 | 0.001014 | 0.008893 | 0.006591 | 2 |
| GO:0090266 | regulation of mitotic cell cycle spindle assembly checkpoint | 2/65 | 14/17653 | 0.001181 | 0.009842 | 0.007294 | 2 |
| GO:1903504 | regulation of mitotic spindle checkpoint                     | 2/65 | 14/17653 | 0.001181 | 0.009842 | 0.007294 | 2 |
| GO:0090231 | regulation of spindle checkpoint                             | 2/65 | 15/17653 | 0.001359 | 0.010798 | 0.008002 | 2 |
| GO:0002082 | regulation of oxidative phosphorylation                      | 2/65 | 16/17653 | 0.00155  | 0.012122 | 0.008984 | 2 |
| GO:0007100 | mitotic centrosome separation                                | 2/65 | 16/17653 | 0.00155  | 0.012122 | 0.008984 | 2 |
| GO:0009070 | serine family amino acid biosynthetic process                | 2/65 | 17/17653 | 0.001752 | 0.013191 | 0.009776 | 2 |
| GO:0051299 | centrosome separation                                        | 2/65 | 17/17653 | 0.001752 | 0.013191 | 0.009776 | 2 |
| GO:0051782 | negative regulation of cell division                         | 2/65 | 17/17653 | 0.001752 | 0.013191 | 0.009776 | 2 |

|            |                                                 |      |          |          |          |          |   |
|------------|-------------------------------------------------|------|----------|----------|----------|----------|---|
| GO:0055012 | ventricular cardiac muscle cell differentiation | 2/65 | 17/17653 | 0.001752 | 0.013191 | 0.009776 | 2 |
|------------|-------------------------------------------------|------|----------|----------|----------|----------|---|

Table S2: Survival analysis of hub genes in co-expression network.

| <b>Gene symbol</b> | <b>logrank <i>P</i></b> | <b>HR</b>        |
|--------------------|-------------------------|------------------|
| ANLN               | 0.0036                  | 1.54 (1.15-2.07) |
| ASPM               | 0.033                   | 1.39 (1.03-1.88) |
| ATAD2              | 0.085                   | 0.75 (0.53-1.04) |
| AURKA              | 0.074                   | 1.34 (0.97-1.85) |
| BIRC5              | 0.13                    | 1.28 (0.93-1.76) |
| C4orf46            | 0.018                   | 0.7 (0.52-0.94)  |
| CCNA2              | 0.18                    | 1.24 (0.91-1.68) |
| CCNB1              | 0.0044                  | 1.54 (1.14-2.08) |
| CDC20              | 0.011                   | 1.52 (1.1-2.1)   |
| CDC25A             | 0.22                    | 1.2 (0.89-1.62)  |
| CDK1               | 0.11                    | 0.78 (0.58-1.06) |
| CDK5R1             | 0.088                   | 1.32 (0.96-1.83) |
| CDKN3              | 0.061                   | 1.33 (0.99-1.79) |
| CENPA              | 0.32                    | 1.19 (0.85-1.66) |
| CENPE              | 0.26                    | 1.19 (0.88-1.6)  |
| CENPN              | 0.14                    | 1.32 (0.91-1.9)  |
| CEP55              | 0.2                     | 0.82 (0.61-1.11) |
| CHAC2              | 0.22                    | 0.82 (0.6-1.13)  |
| DEPDC1             | 0.14                    | 1.27 (0.92-1.75) |
| DEPDC1B            | 0.071                   | 0.76 (0.56-1.03) |
| DIAPH3             | 0.0062                  | 1.55 (1.13-2.12) |
| DLGAP5             | 0.021                   | 1.41 (1.05-1.89) |
| FAM64A             | 0.089                   | 0.76 (0.55-1.04) |
| FAM72A             | 0.054                   | 1.36 (0.99-1.85) |
| FOXM1              | 0.22                    | 1.2 (0.89-1.62)  |
| GGH                | 0.07                    | 1.31 (0.98-1.76) |
| HMMR               | 0.016                   | 1.48 (1.07-2.05) |
| KIF11              | 0.28                    | 1.19 (0.87-1.63) |
| KIF23              | 0.13                    | 0.8 (0.59-1.07)  |
| KIF4A              | 0.18                    | 0.82 (0.61-1.1)  |
| MCM10              | 0.11                    | 1.29 (0.94-1.77) |
| MKI67              | 0.45                    | 1.12 (0.83-1.5)  |
| MLF1               | 0.045                   | 1.36 (1.01-1.83) |
| MTFR2              | 0.04                    | 0.73 (0.54-0.99) |
| NETO2              | 0.13                    | 1.27 (0.93-1.74) |
| NSUN6              | 0.0026                  | 0.6 (0.43-0.84)  |
| NUF2               | 0.11                    | 0.77 (0.56-1.06) |
| ODC1               | 0.14                    | 1.27 (0.92-1.74) |
| OIP5               | 0.033                   | 1.39 (1.03-1.87) |

---

|         |      |                  |
|---------|------|------------------|
| PBK     | 0.08 | 1.3 (0.97-1.75)  |
| PSRC1   | 0.22 | 1.21 (0.89-1.63) |
| SHCBP1  | 0.3  | 1.21 (0.85-1.73) |
| SPC25   | 0.22 | 0.83 (0.62-1.12) |
| TMEM38B | 0.12 | 1.29 (0.94-1.76) |
| TRIP13  | 0.37 | 1.16 (0.83-1.63) |

---
